1  
2  
3  
4  
5  
6  
7  
8  
9  
10  
11  
12  
13  
14  
15  
16  
17  
18  
19  
20  
21  
22  
23  
24  
25  
26  
27  
28  
29

# Microsecond Interaural Time Difference Discrimination Restored by Cochlear Implants After Neonatal Deafness

Nicole Rosskothén-Kuhl<sup>1,2\*</sup>, Alexa N Buck<sup>1</sup>, Kongyan Li<sup>1</sup>, Jan W H Schnupp<sup>1\*</sup>

1) Department of Biomedical Sciences, City University of Hong Kong, Hong Kong (SAR  
China);

2) Neurobiological Research Laboratory, Section for Clinical and Experimental Otology,  
University Medical Center Freiburg, Freiburg, Germany

\*Correspondence: [nicole.rosskothen@uniklinik-freiburg.de](mailto:nicole.rosskothen@uniklinik-freiburg.de); [wschnupp@cityu.edu.hk](mailto:wschnupp@cityu.edu.hk)

## Contact Info

### Corresponding authors:

Dr. Nicole Rosskothén-Kuhl

Neurobiological Research Laboratory,  
Section for Clinical and Experimental Otology,  
University Medical Center Freiburg,  
Killianst. 5, 79106 Freiburg i. Br., Germany  
Phone: +49 761 27042650  
[nicole.rosskothen@uniklinik-freiburg.de](mailto:nicole.rosskothen@uniklinik-freiburg.de)

Prof Jan Schnupp

Department of Biomedical Sciences  
City University of Hong Kong  
31 To Yuen Street  
Kowloon, Hong Kong  
[wschnupp@cityu.edu.hk](mailto:wschnupp@cityu.edu.hk)

## 30 **Keywords**

- 31 Deafness; prosthetics; cochlear implant; binaural hearing; interaural time difference;  
32 psychoacoustics; hearing experience; inferior colliculus

## 33 **Abstract**

34 Cochlear implants (CIs) can restore a high degree of functional hearing in deaf patients but  
35 enable only poor spatial hearing or hearing in noise. Early deaf CI users are essentially  
36 completely insensitive to interaural time differences (ITDs). A dearth of binaural experience  
37 during an early critical period is often blamed for these shortcomings. However, here we  
38 show that neonatally deafened rats which are fitted with binaural CIs in early adulthood are  
39 highly sensitive to ITDs immediately after implantation. Under binaural synchronized  
40 stimulation they can be trained to localize ITDs with essentially normal behavioral  
41 thresholds near 50  $\mu$ s. This suggests that the deficits seen in human patients are unlikely  
42 to be caused by lack of experience during their period of deafness. It may instead be due  
43 to months or years of CI stimulation with inappropriate binaural parameters provided by CI  
44 processors which do not provide sub-millisecond temporal fine structure of sounds.

45

46 The World Health Organization reports that about 466 million people suffer from disabling  
47 hearing loss, making it the most common sensory impairment of our age. For people with  
48 severe to profound sensorineural hearing loss, cochlear implants (CIs) can be enormously  
49 beneficial, quite routinely allowing near normal spoken language acquisition, particularly  
50 when CI implantation takes place early in life [1]. Never the less the performance of CI  
51 users remains variable, and even in the best cases falls short of natural hearing.

52 Good speech understanding in multi-sound environment requires the ability to separate  
53 speech from background, which relies in part on a phenomenon known as “spatial release  
54 from masking”. This relies on the brain’s ability to process binaural spatial cues, including  
55 interaural level and interaural time differences (ILDs/ITDs) [2]. To benefit from binaural  
56 cues in everyday life, bilateral cochlear implantation is becoming increasingly common for  
57 deaf patients [3-5]. However, even binaural CI patients perform much below the level of  
58 normal listeners in sound localization or auditory scene analysis tasks, particularly when  
59 multiple sound sources are present [6,7]. The parameters that would allow CI patients to  
60 derive maximum benefits from binaural spatial cues are still only partially understood. A  
61 number of technical problems (see [8], chapter 6) limit the fidelity with which CIs can  
62 encode binaural cues, particularly ITDs. The fact that contemporary CI speech processors  
63 were originally designed for monaural, rather than binaural, hearing likely contributes the  
64 observed deficits in ITD performance of bilateral CI users [3]. Standard CI processors  
65 provide pulsatile stimulation which is not locked to the temporal fine structure of the  
66 incoming sounds, and the timing of the electrical pulses is not synchronized between both  
67 ears, which makes these devices fundamentally incapable of encoding sub-millisecond  
68 binaural time structure. To be useful, ITDs as small as a few tens of  $\mu\text{s}$  need to be  
69 resolved. Under optimal conditions, normal human listeners may be able to detect ITDs  
70 not much larger than 10  $\mu\text{s}$  [9]. In contrast, the ITD sensitivity of CI patients is highly  
71 variable and generally very poor, even when tested with experimental processors capable  
72 of delivering synchronized stimulus pulses with sub-millisecond resolution [3,5-7,10,11].

73 The binaural performance of CI patients depends to a fair extent on the patients’ history.  
74 Importantly, pre-lingually deaf CI users invariably appear to exhibit no ITD sensitivity at all,  
75 whereas many post-lingually deaf CI users do exhibit at least some degree of ITD  
76 sensitivity [4,5,11-13]. This has led to the suggestion that early auditory deprivation during  
77 a sensitive period may prevent the development of ITD sensitivity, and that this cannot be  
78 recovered with later binaural stimulation using state-of-the-art speech processors  
79 [1,13,14]. If that hypothesis is correct, then developing more sophisticated binaural CI  
80 processors might not benefit the many patients who are born deaf or lose their hearing  
81 very early in life. By the time these patients are old enough to receive implants, they may  
82 already have missed out on the formative sensory input needed to develop the brain  
83 circuitry required for binaural processing with microsecond precision. This possibility  
84 seems particularly plausible given that immunohistochemical studies have shown that the  
85 tonotopic organization is degraded [15,16] and that stimulation-induced molecular,  
86 morphological, and electrophysiological plasticity is altered in neonatally deafened rats  
87 compared to CI-stimulated rats with normal auditory development [15-19]. Furthermore, it  
88 has been shown that early acoustic experience shapes ITD tuning curves in key brainstem

89 nuclei of gerbils [20], probably by shaping the precise timing of inhibitory inputs into  
90 superior olivary nuclei [20,21].

91 However, it is also possible that the unstimulated auditory pathway may retain the ability to  
92 encode ITDs during a period of early deafness, and may only lose it as a result of  
93 maladaptive plasticity after a period of CI stimulation which conveys no useful ITD  
94 information. These possibilities cannot be distinguished based on clinical data, as there  
95 are no binaural CI processors capable of resolving sub-millisecond ITDs which are  
96 currently available for implantation in neonatally deaf children. To find out what level of  
97 binaural performance might be achievable with different stimulation strategies therefore  
98 requires animal experimentation. So far, studies investigating binaural sensitivity with CIs  
99 in adult, early deaf animals have been limited to acute electrophysiological experiments on  
100 cats, and these studies have reported significant amounts of ITD sensitivity in the inferior  
101 colliculus (IC) [22-24] and auditory cortex (AC) [25,26], even if that sensitivity appeared  
102 reduced compared to that seen with acoustic stimulation in normal animals. However,  
103 there have been no previous attempts to measure the extent to which chronic, precisely  
104 synchronized, bilateral CI stimulation might restore the ability of an adult implanted,  
105 neonatally deaf animal to use ITDs across the normal, sub-millisecond physiological range  
106 to guide behavior. We here address this question by investigating ITD sensitivity, both  
107 physiologically and behaviorally, in cohorts of neonatally deafened rats which received  
108 synchronized bilateral CIs in young adulthood.

## 109 **Results**

110 Experiments were performed on 14 female Wistar rats. Litter mates were divided into three  
111 groups: 1) neonatally deafened (ND) rats (n=4) who received bilateral CIs in young  
112 adulthood (postnatal weeks 10-14), followed immediately by acute, terminal IC recording  
113 under anesthesia; 2) ND rats (n=5) who received chronic bilateral CIs in young adulthood  
114 (10-14 weeks) and were trained on ITD discrimination with electric stimulation; and 3)  
115 normal hearing (NH) rats (n=5) trained in young adulthood on ITD discrimination with  
116 acoustic stimuli. Care and use of all rats reported here were approved by the appropriate  
117 agency (Department of Health of Hong Kong, permission number 16-52 DH/HA&P/8/2/5;  
118 Regierungspräsidium Freiburg, permission number 35-9185.81/G-17/124).

### 119 **IC neurons of ND rats exhibit varying degrees and types of ITD sensitivity** 120 **immediately after adult cochlear implantation.**

121 To measure the physiological ITD sensitivity of hearing inexperienced rat brains, we  
122 recorded responses to isolated, bilateral CI pulse stimuli with ITDs varying randomly over  
123 a  $\pm 160 \mu\text{s}$  range (ca 130% of the rat's physiological range [27]). We recorded from n=1230  
124 multi-units in the IC of four ND rats. The binaural stimuli were simple biphasic current  
125 pulses of identical amplitude in each ear. The only parameter that varied from trial to trial  
126 was the interaural timing, and any systematic differences in responses can only be  
127 attributed to ITD sensitivity (see Fig. S2). Responses of IC neurons were detected for  
128 currents as low as 100  $\mu\text{A}$  or less. Figure 1 shows a selection of responses as raster plots

129 (Fig. 1a) and the corresponding ITD tuning curves (Fig. 1b). As might be expected in light  
130 of previous studies investigating ITD sensitivity in the IC [22,24,28,29], we observed that  
131 the large majority of multi-units exhibited at least some, and at times substantial degrees  
132 of tuning to stimulus ITD.

133 The manner in which changes in ITD changed neural discharge patterns was also highly  
134 variable from one recording site to the next. While many multi-units showed typical short-  
135 latency onset responses to the stimulus which varied in response amplitude (Fig. 1a, #2,  
136 #3, #6, #9), some showed sustained, but still clearly tuned, responses extending for up to  
137 80 ms or longer post-stimulus (Fig. 1a, #5, #7, #8). The shapes of ITD tuning curves we  
138 observed in rat IC (Fig. 1b) resembled the “peak”, “biphasic” or “sigmoid”, and “multi-peak”  
139 shapes previously described in the IC of cats [28].

### 140 **Signal-to-noise and mutual information values show that substantial ITD** 141 **tuning is widespread in the IC of ND rats.**

142 To quantify how strongly the neural responses recorded at any one site depended on  
143 stimulus ITD we used two measures previously described in the literature. The first, a  
144 signal to noise ratio (SNR), was calculated as described by [22], and simply quantifies the  
145 proportion of the trial-to-trial response variance that can be accounted for by changes in  
146 ITD (see Methods for details). The second, a mutual information (MI) measure, quantifies  
147 the mutual information between trial-to-trial response amplitude and stimulus ITD in bits  
148 per response. It was calculated using a direct method with shuffling for bias correction (see  
149 Methods for details). Each sub-panel of Figure 1 indicates the SNR and MI values  
150 obtained for the corresponding multi-unit, while Figure 2 shows the distributions of SNR  
151 (Fig. 2a) and MI (Fig. 2b) values, respectively. For comparison, Figure 2a also shows the  
152 SNR values reported by [22] for the IC of congenitally deaf cats. As can be readily seen  
153 from Figure 2, multi-units with quite substantial ITD tuning (SNRs or MI values  $\geq 0.5$ ) are  
154 by no means rare exceptions. The amount of ITD tuning we observed in the IC of  
155 neonatally deafened, adult CI-implanted rats is about the same as reported for deaf cats,  
156 although the proportion of units with ITD SNR  $> 0.5$  is higher in our rats. Furthermore, the  
157 great majority (1050/1230  $\approx 85\%$ ) of multi-units showed statistically significant ITD tuning  
158 ( $p \leq 0.01$ ), as determined by MI values significantly greater than zero (permutation test,  
159  $\alpha = 0.01$ ).

160 The results in Figures 1 and 2 clearly illustrate that the auditory midbrain of adult implanted  
161 ND rats exhibits substantial amounts of tuning to changes in ITDs of CI pulse stimuli of just  
162 a few tens of  $\mu\text{s}$ . Behavioral experiments described next showed that ND rats can readily  
163 learn to use this neural sensitivity to perform behavioral ITD discrimination with an  
164 accuracy similar to that seen in their NH litter mates.

### 165 **Early deaf CI rats discriminate ITD as accurately as their normally hearing** 166 **litter mates.**

167 We trained five ND, adult implanted rats and five NH rats in a simple two-alternative forced  
168 choice (2AFC) ITD lateralization task. The animals had to initiate trials by licking a center

169 “start spout”, and then respond to 200 ms long 50 Hz binaural pulse trains by licking one of  
170 two “response spouts” positioned to either side to receive drinking water as a positive  
171 reinforcer (Figs. S2a, S3b). Which response spout would give water was signaled by the  
172 ITD of the stimulus. Again, we used simple biphasic pulses of identical amplitude in each  
173 ear, so that systematic ITD differences were the only reliable cue available to the animal  
174 (Fig. S2c-d). While the ND rats were stimulated with electrical pulse trains delivered  
175 through chronic CIs, the NH rats were stimulated with acoustic pulse trains delivered  
176 through near-field sound tubes positioned next to each ear when the animal was lined up  
177 to the start spout (Fig. S3a). During testing, stimulus ITDs varied randomly, and the  
178 discrimination performance of each rat as a function of ITD was fitted with sigmoid  
179 psychometric functions. Further details are given in the Methods section. The behavioral  
180 performance of each animal is shown in Figure 3, using light blue for NH (top) and dark  
181 blue for ND (bottom) animals.

182 It is readily apparent from Figure 3 that all rats, whether NH or ND with CIs, were capable  
183 of lateralizing ITDs. As might be expected, the behavioral sensitivity and performance was  
184 variable between individuals, with some animals (e.g. NH 1604 or CI 1734) exhibiting very  
185 few lapses and near perfect performance at ITDs larger than 0.1 ms, while others (e.g. NH  
186 1606) had higher error rates and a less steep dependence of responses on stimulus ITD.  
187 To quantify the behavioral sensitivity of each rat to ITD we fitted psychometric curves (red  
188 lines in Fig. 3) to the raw behavioral data and calculated the slope of that curve at ITD=0.  
189 Figure 3k summarizes these slopes for NH (light blue) and ND CI (dark blue) animals. The  
190 slopes for ND CI rats and NH rats fall within the same range. The differences in mean  
191 slope were so small between both experimental groups (NH: 0.489 %/ $\mu$ s, ND CI: 0.601  
192 %/ $\mu$ s) that very large cohorts of animals would be required to have any reasonable  
193 prospect of finding a significant difference. Similarly, the two cohorts showed quite similar  
194 75% correct lateralization performance: NH rats with median of 45.4  $\mu$ s and mean of 80.9  
195  $\mu$ s; ND CI rats with median of 57.8  $\mu$ s and mean of 60.3  $\mu$ s. Remarkably, the ITD  
196 thresholds of our CI rats are thus orders of magnitude better than those reported for early  
197 deaf human CI patients, who typically have ITD thresholds too large to measure, in excess  
198 of 3000  $\mu$ s [5,30]. Indeed, their thresholds are not dissimilar from the approx. 10-60  $\mu$ s  
199 range of 75% correct ITD discrimination thresholds reported for normal human subjects  
200 tested with noise bursts [31], and pure tones [9], or the  $\approx$  40  $\mu$ s thresholds reported for  
201 normally hearing ferrets tested with noise bursts [32].

## 202 Discussion

203 This study is the first demonstration that, at least in rats, a lack of auditory experience in  
204 early development does not inevitably lead to impaired binaural time processing in  
205 subjects supplied with CIs in adulthood. These results may well generalize to other  
206 mammalian species, with major potential implications: If early deaf human CI patients  
207 cannot achieve accurate ITD discrimination, but early deaf CI rats can, then we should  
208 review with some urgency the manner in which we supply early deaf human patients with  
209 binaural CI stimulation.

210 But before we discuss these potential implications, we should address three aspects of  
211 this study which colleagues in this field of research may find surprising:

212 Firstly, some studies deemed rats to be generally poor at processing ITDs [33,34].  
213 However, the only previous behavioral study in rats only tested interaural phase sensitivity  
214 of relatively low frequency tones. We focused on broad-band acoustic or electrical pulse  
215 stimuli which provide plenty of "onset" and "envelope" ITDs, and which are processed well  
216 even at high carrier frequencies [35,36]. That may also explain why our CI rats showed  
217 good ITD sensitivity even though our CIs targeted the mid-frequency region of their  
218 cochleae, and not the apical region normally associated with low frequency hearing.  
219 Recent studies in human CI patients who suffered late deafness have shown that ITDs  
220 delivered to mid, and even high-frequency parts of the cochlea can be detected  
221 behaviorally [5,37].

222 Secondly, previous electrophysiological studies on congenitally deaf CI cats reported a  
223 substantially reduced ITD sensitivity relative to that seen in NH animals [22,25,26]. These  
224 studies recorded neural tuning relatively high up in the auditory pathway (AC and IC  
225 respectively), so one cannot be certain whether the relatively reduced sensitivity seen  
226 reflects a fundamental degradation of ITD processing in the olivary nuclei, or merely a poor  
227 maturation of connections from there to higher order areas which might be reversed with  
228 experience and training. In the IC of our ND rats we found significant ITD sensitivity in 85%  
229 of recordings sites, compared to only 48% previously reported for congenitally deaf cats  
230 [22]. The proportion of ITD sensitive sites in our ND rats is thus more similar to reported  
231 proportions in adult deafened cats (84%-86%; [22,28]), rabbits (73%; [38]) or gerbils (at  
232 least 74%; [29]). Our Figure 2a also shows a relatively greater proportion of units showing  
233 ITD SNRs above 0.6 for our ND rats than for ND cats of [22]. These relatively modest  
234 differences in proportions of sensitive sites are probably at least in large part to  
235 methodological differences. For example, Hancock et al. [22] recorded single-unit data,  
236 while we report analog multi-unit data which is likely to give better SNRs, and hence also a  
237 higher proportion of units above significance threshold, simply by pooling responses over  
238 multiple, similarly tuned neighboring units.

239 Thirdly, we don't really know how much ITD tuning in the IC or AC is really necessary to  
240 make ITD discrimination thresholds of  $\approx 50 \mu\text{s}$  possible. Even if the amount of ITD  
241 sensitivity reported in the IC [22] and AC [25,26] of congenitally deaf cats is somewhat less  
242 than that in normal cats, it may still be sufficient to permit accurate localization behavior,  
243 and it might improve with training. Thus, while our finding of apparently normal behavioral  
244 ITD sensitivity in ND rats may appear surprising, it is not in contradiction with previously  
245 published animal work [22,24-26].

246 Finally, the biggest difference between our results and that from previously published  
247 studies remains the vastly better behavioral ITD discrimination we see in our ND CI rats  
248 compared to that reported for early deaf human CI patients [5,13]. Previous authors have  
249 put forward a number of possible explanations for the very poor performance seen in these  
250 human patients, including "factors such as auditory deprivation, in particular, lack of early  
251 exposure to consistent timing differences between the ears" [5]. However, our ND rats



252 achieved very good performance despite lack of early exposure, which makes that  
253 explanation appear substantially less likely. Admittedly, there may be species differences  
254 at play here. Our ND animals were implanted in young adulthood and thus were severely  
255 deprived of auditory input throughout their childhood. But humans mature much more  
256 slowly so that even human patients implanted at a very young age will have been deprived  
257 of auditory input for a substantially longer absolute time period compared with our rats.  
258 Nevertheless, our results strongly hint at the possibility that the complete insensitivity of  
259 current early deaf, binaural CI patients to ITD cues may be not so much the “lack of  
260 exposure to consistent timing differences”, but rather the massive and prolonged exposure  
261 to entirely inconsistent ITDs they will experience as soon as they are bilaterally fitted with  
262 standard implants which do not synchronize inputs between ears. In addition, most  
263 binaural CI patients receive their CIs sequentially, and their initial, potentially formative,  
264 auditory experience is therefore monaural.

265 Developmental anatomical studies in ferrets have shown that the formation of afferent  
266 synapses to medial superior olive, one of the main brainstem nuclei for ITD processing, is  
267 essentially complete before the onset of hearing [39]. Similarly, the highly specialized calyx  
268 of held synapses which are thought to play key roles in relaying precisely timed  
269 information in the binaural circuitry of the brainstem have also been shown to mature  
270 before the onset of hearing in mice [40]. Admittedly, it has been shown in gerbils that key  
271 parts of the binaural ITD processing circuitry in the auditory brainstem will fail to mature  
272 when driven with strong, uninformative omnidirectional white noise stimulation during a  
273 critical period [20,32,41-43], but there are no studies demonstrating that critical periods in  
274 the ITD pathways will irrevocably close if sensory input is simply absent. These data are  
275 therefore also compatible with our interpretation that inappropriate input, rather than a lack  
276 of experience, may be the predominant reason why neonatally deaf CI users fail to  
277 develop ITD sensitivity.

278 It is well known that the normal auditory system not only combines ITD information with  
279 ILD and monaural spectral cues to localize sounds in space, but that it also adapts  
280 strongly to changes in these cues and can re-weight them depending on their reliability  
281 [26,44,45]. Current standard CI processors produce pulsatile stimulation based on fixed  
282 rate interleaved sampling, which is neither synced to stimulus fine structure nor  
283 synchronized between the ears. Consequently these processors only ever provide  
284 uninformative ITDs to the children fitted with these devices. In sharp contrast, for our ND  
285 CI rats, binaural cues were essentially the only form of useful auditory input they ever  
286 experienced, and they quickly learned to make effective use of them. Thus, the brainstem  
287 circuits of human children fitted with conventional binaural CIs may simply “learn” to ignore  
288 inputs that aren’t helpful. That would be adaptive to them given that the only ITDs they  
289 ever receive carry no useful information about the external world.

290 In the light of our data, we suggest that the mammalian auditory system develops some  
291 sensitivity to ITD cues in the absence of early sensory input, which is then either refined or  
292 lost depending on whether the inputs received once hearing starts are appropriate and  
293 informative or not. For the visual system it has already been shown that orientation  
294 selective neuronal responses exist at eye-opening and thus are established without visual

295 input [46]. Whether human CI patients are able to recover near normal ITD sensitivity  
296 much later if rehabilitated with useful ITDs for prolonged periods, or whether their ability to  
297 process microsecond ITDs atrophies irreversibly, is unknown. The inability of early deaf CI  
298 patients to use ITDs may thus be somewhat similar to conditions such as amblyopia or  
299 failures of stereoscopic depth vision development, pathologies which are caused more by  
300 unbalanced or inappropriate inputs than by a lack of sensory experience [47].

301 While these interpretations of our findings would lead us to argue strongly that binaural CI  
302 processing strategies ought to change to make microsecond ITD information available to  
303 early deaf binaural CI patients, one must nevertheless acknowledge that it may be difficult  
304 to change established CI processing strategies without at the same time compromising the  
305 CI's effectiveness in encoding speech formant information. The continuous interleaved  
306 sampling (CIS) paradigm [48] from which almost all current CI speech processing  
307 algorithms are derived, times the stimulus pulses so that only one electrode channel  
308 delivers a pulse at any one time. This is thought to minimize "current spread" in the inner  
309 ear which might further reduce the accuracy of the already quite limited tonotopic place  
310 coding which CIs can deliver. At the same time, CI processors routinely run at relatively  
311 high pulse rates (900 Hz and above), which seems to be necessary to encode enough  
312 information about amplitude modulations (AM) in speech signals to facilitate accurate word  
313 recognition [49]. Here, the needs for speech encoding and ITD encoding seem to diverge,  
314 as previous studies on humans [50,51] and animals [38] have shown that ITD  
315 discrimination deteriorates dramatically when pulse rates exceed a few hundred Hz. This  
316 fact is likely related to the physiological observation that the ability of superior olivary  
317 neurons to encode envelope ITDs declines at envelope rates exceeding several hundred  
318 Hz [52]. Our own behavioral experiments described here were conducted with very low  
319 pulse rates of only 50 Hz, and it is doubtful that our animals would have been able to  
320 perform the task nearly as well at pulse rates close to 1 kHz.

321 Thus, designers of novel human binaural CI speech processors face seemingly  
322 irreconcilable demands: They must invent devices which fire each of 20 or more electrode  
323 channels in turn, at rates that are at the same time fast, so as to encode speech AM in fine  
324 detail, but also slow, so as not to overtax the brainstem's ITD extraction mechanisms. In  
325 addition, they must make the timing of at least some of these pulses encode stimulus fine  
326 structure and ITDs. While that is difficult, it may not be impossible, and promising lines of  
327 research are already pursued, which either use a mixture of different pulse rates for  
328 different electrode channels [53] or "reset" the brain's ITD extraction mechanisms by  
329 introducing occasional "double pulses" into the stimulus regime [54]. However, a detailed  
330 discussion of such approaches is beyond the scope of this paper. Our findings raise the  
331 hope that even early deafened patients may be able to develop useful ITD sensitivity, if  
332 informative ITD cues are made available to them right after implantation and they are not  
333 subjected to prolonged CI stimulation with ITDs which are uninformative.

334

## 335 **Methods**

### 336 **Deafening**

337 Rats were neonatally deafened by daily intraperitoneal (i.p.) injections of 400 mg/kg  
338 kanamycin from postnatal day 9 to 20 inclusively [15,17]. This is known to cause  
339 widespread death of inner and outer hair cells [17,55,56] while keeping the number of  
340 spiral ganglion cells comparable to that in untreated control rats [56]. We verified that this  
341 procedure provoked profound hearing loss (> 90 dB) by first, the loss of Preyer's reflex  
342 [57], before the onset of neural auditory brainstem response (ABRs) to pure tone pips [58],  
343 and second, the absence of ABRs (Fig. S1b). ABRs were measured as described in [19]:  
344 under ketamine (80mg/kg) and xylazine (12 mg/kg) anesthesia each ear was stimulated  
345 separately through hollow ear bars with 0.5 ms broad-band clicks with peak amplitudes up  
346 to 130 dB SPL delivered at a rate of 23 Hz. ABRs were recorded by averaging scalp  
347 potentials measured with subcutaneous needle electrodes between mastoids and the  
348 vertex of the rat's head over 400 click presentations. While normal rats typically exhibited  
349 click ABR thresholds near 30 dB SPL (Fig. S1a), deafened rats had very high click  
350 thresholds of  $\geq 130$  dB SPL; Fig. S1b) [20,41].

### 351 **CI implantation, stimulation and testing**

352 All surgical procedures, including CI implantation and craniotomy, were performed under  
353 anaesthesia induced with i.p. injection of ketamine (80mg/kg) and xylazine (12 mg/kg). For  
354 maintenance of anesthesia during electrophysiological recordings, a pump delivered an  
355 i.p. infusion of 0.9% saline solution of ketamine (17.8 mg/kg/h) and xylazine (2.7 mg/kg/h)  
356 at a rate of 3.1 ml/h. During surgical and experimental procedures the body temperature  
357 was maintained at 38°C using a feedback-controlled heating pad (RWD Life Sciences,  
358 Shenzhen, China). Further detailed descriptions of our cochlear implantation methods can  
359 be found in previous studies [15,59-62]. In short, two to four rings of an eight channel  
360 electrode carrier (ST08.45, Peira, Beerse, Belgium) were fully inserted through a  
361 cochleostomy in medio-dorsal direction into the middle turn of both cochleae.

362 Electrically evoked ABRs (EABRs) were measured for each ear individually to verify that  
363 both CIs were successfully implanted and operated at acceptably low electrical stimulation  
364 thresholds, usually around 100  $\mu$ A (Fig. S1c). EABR recording used isolated biphasic  
365 pulses (see below) with a 23 ms inter-pulse interval. EABR mean amplitudes were  
366 determined by averaging scalp potentials over 400 pulses for each stimulus amplitude. For  
367 electrophysiology experiments, EABRs were also measured immediately before and after  
368 IC recordings, and for the chronically implanted rats, EABRs were measured once a week  
369 under anesthesia to verify that the CIs functioned properly and stimulation thresholds were  
370 stable.

## 371 **Electric and acoustic stimuli**

372 The electrical stimuli used to examine the animals' EABRs, the physiological, and the  
373 behavioral ITD sensitivity were generated using a Tucker Davis Technology (TDT, Alachua,  
374 Florida, US) IZ2MH programmable constant current stimulator at a sample rate of  
375 48,828.125 Hz. The most apical ring of the CI electrode served as stimulating electrode,  
376 the next ring as ground electrode. All electrical intracochlear stimulation used biphasic  
377 current pulses similar to those used in clinical devices (duty cycle: 61.44  $\mu$ s positive, 40.96  
378  $\mu$ s at zero, 61.44  $\mu$ s negative), with peak amplitudes of up to 300  $\mu$ A, depending on  
379 physiological thresholds or informally assessed behavioral comfort levels (rats will scratch  
380 their ears frequently, startle or show other signs of discomfort if stimuli are too intense).  
381 For behavioral training we stimulated all CI rats 6 dB above these thresholds.

382 Acoustic stimuli used to measure behavioral ITD sensitivity in NH rats were single sample  
383 pulse clicks generated at a sample rate of 48,000 Hz via a Raspberry Pi 3 computer  
384 connected to a USB sound card (StarTech.com, Ontario Canada, part #  
385 ICUSBAUDIOMH), amplifier (Adafruit stereo 3.7W class D audio amplifier, New York City,  
386 US, part # 987) and miniature high fidelity headphone drivers (GQ-30783-000, Knowles,  
387 Itasca, Illinois, US) which were mounted on hollow tubes. Stimuli were delivered at sound  
388 intensities of  $\approx$  80 dB SPL.

389 To produce electric or acoustic stimuli of varying ITDs spanning the rat's physiological  
390 range of  $\pm$  120  $\mu$ s [27], stimulus pulses of identical shape and amplitude were presented  
391 to each ear, with the pulses in one ear delayed by an integer number of samples. Given  
392 the sample rates of the devices used, ITDs could thus be varied in steps of 20.48  $\mu$ s for  
393 the electrical, and 20.83  $\mu$ s for the acoustic stimuli. The physiological experiments  
394 described here used single pulse stimuli presented in isolation, while the behavior  
395 experiments used 200 ms long 50 Hz pulse trains.

## 396 **Animal psychoacoustic testing**

397 We trained our rats on 2AFC sound lateralization tasks using methods similar to those  
398 described in [32,42,43]. The behavioral animals were put on a schedule with six days of  
399 testing, during which the rats obtained their drinking water as a positive reinforcer, followed  
400 by one day off, with *ad-lib* water. The evening before the next behavioral testing period,  
401 drinking water bottles were removed. During testing periods, the rats were given two  
402 sessions per day. Each session lasted 25-30 min, which typically took 150-200 trials during  
403 which  $\approx$  10 ml of water were consumed.

404 One of the walls of each behavior cage was fitted with three brass water spouts, mounted  
405  $\approx$  6-7 cm from the floor and separated by  $\approx$  7.5 cm (Fig. S2a-b). We used one center "start  
406 spout" for initiating trials and one left and one right "response spout" for indicating whether  
407 the stimulus presented during the trial was perceived as lateralized to that side. Contact  
408 with the spouts was detected by capacitive touch detectors (Adafruit industries, New York  
409 City, US, part # 1362). Initiating a trial at the center spout triggered the release of a single  
410 drop of water through a solenoid valve. Correct lateralization triggered three drops of water  
411 as positive reinforcement. Incorrect responses triggered no water delivery but caused a 5-

412 15 s timeout during which no new trial could be initiated. Timeouts were also marked by a  
413 negative feedback sound for the NH rats, or a flashing LED for the ND CI rats. After each  
414 correct trial a new ITD was chosen randomly from a set spanning  $\pm 160 \mu\text{s}$  in  $25 \mu\text{s}$  steps,  
415 but after each incorrect trial the last stimulus was repeated in a “correction trial”. Correction  
416 trials prevent animals from developing idiosyncratic biases favoring one side [42,63], but  
417 since they could be answered correctly without attention to the stimuli by a simple “if you  
418 just made a mistake, change side” strategy, they are excluded from the final psychometric  
419 performance analysis.

420 The NH rats received their acoustic stimuli through stainless steel hollow ear tubes placed  
421 such that, when the animal was engaging the start spout, the tips of the tubes were  
422 located right next to each ear of the animal to allow near-field stimulation (Fig. S3a). The  
423 pulses resonated in the tubes, producing pulse-resonant sounds, resembling single-  
424 formant artificial vowels with a fundamental frequency corresponding to the click rate. Note  
425 that this mode of sound delivery is thus very much like that produced by “open”  
426 headphones, such as those commonly used in previous studies on binaural hearing in  
427 humans and animals, e.g. [32,64]. We used a 3D printed “rat kemar head” with miniature  
428 microphones in the ear canals (Fig. S3c). It produced a frequency dependent channel  
429 separation between ears of  $\geq 20\text{dB}$  at the lowest, fundamental frequency and around 40  
430 dB overall (data not shown). The ND CI rats received their auditory stimulation via bilateral  
431 CIs described above, connected to the TDT IZ2MH stimulator via a custom-made, head  
432 mounted connector and commutator, as described in [61].

### 433 **Multi-unit recording from IC**

434 Anesthetized rats were head fixed in a stereotactic frame (RWD Life Sciences),  
435 craniotomies were performed bilaterally just anterior to lambda. The animal and  
436 stereotactic frame were positioned in a sound attenuating chamber, and a single-shaft, 32-  
437 channel silicon electrode array (ATLAS Neuroengineering, E32-50-S1-L6) was inserted  
438 stereotactically into the left or right IC through the overlying occipital cortex using a  
439 micromanipulator (RWD Life Sciences). Extracellular signals were sampled at a rate of  
440 24.414 Hz with a TDT RZ2 with a NeuroDigitizer headstage and BrainWare software. Our  
441 recordings typically exhibited short response latencies ( $\approx 3\text{-}5 \text{ ms}$ ), which suggests that  
442 they may come predominantly from the central region of IC. Responses from non-  
443 lemniscal sub-nuclei of IC have been reported to have longer response latencies ( $\approx 20\text{ms}$ ;  
444 [65]).

445 At each electrode site, we first measured neural rate/level functions, varying stimulation  
446 currents in each ear to verify that the recording sites contained neurons responsive to  
447 cochlear stimulation, and to estimate threshold stimulus amplitudes. Thresholds rarely  
448 varied substantially from one recording site to another in any one animal. We then  
449 measured ITD tuning curves by presenting single pulse binaural stimuli with equal  
450 amplitude in each ear,  $\approx 10 \text{ dB}$  above the contralateral ear threshold, in pseudo-random  
451 order. ITDs varied from  $163.84 \mu\text{s}$  (8 samples) contralateral ear leading to  $163.84 \mu\text{s}$   
452 ipsilateral ear leading in  $20.48 \mu\text{s}$  (one sample) steps. Each ITD value was presented 30

453 times at each recording site. The inter-stimulus interval was 500 ms. At the end of the  
454 recording session the animals were overdosed with pentobarbitone.

## 455 **Data analysis**

456 To quantify the extracellular multi-unit responses we calculated the average activity for  
457 each stimulus over a response period (3-80 ms post stimulus onset) as well as baseline  
458 activity (300-500 ms after stimulus onset) at each electrode position. The first 2.5 ms post  
459 stimulus onset were dominated by electrical stimulus artifacts and were discarded. For  
460 display purposes of the raster plots in Figure 1 we extracted multi-unit spikes by simple  
461 threshold crossings of the bandpassed (300Hz-6kHz) electrode signal with a threshold set  
462 at four standard deviation of the signal amplitude. To quantify responses for tuning curves,  
463 instead of counting spikes by threshold crossings we instead computed an analog  
464 measure of multi-unit activity (AMUA) amplitudes as described in [66]. The mean AMUA  
465 amplitude during the response and baseline periods was computed by bandpassing  
466 (300Hz-6kHz), rectifying (taking the absolute value) and lowpassing (6 kHz) the electrode  
467 signal. This AMUA value thus measures the mean signal amplitude in the frequency range  
468 in which spikes have energy. As illustrated in Figure 1 of [66], this gives a less noisy  
469 measure of multi-unit neural activity than counting spikes by conventional threshold  
470 crossing measures because the later are subject to errors due to spike collisions, noise  
471 events, or small spikes sometimes reach threshold and sometimes not. The tuning curves  
472 shown in the panels of Figure 1b were measured using this AMUA measure. It is readily  
473 apparent that changes in the AMUA amplitudes track changes in spike density.

## 474 **Signal-to-noise ratio (SNR) calculation**

475 SNR values are a measure of the strength of tuning of neural responses to ITD which we  
476 adopted from [22] to facilitate comparisons from previous work. The SNR is the proportion  
477 of trial-to-trial variance in response amplitude explained by changes in ITD. It is calculated  
478 by computing a one-way ANOVA ( $\alpha=0.01$ ) of responses grouped by ITD value and dividing  
479 the total sum of squares by the group sum of squares. The  $n$  for each ITD was 30 with a  
480 degree of freedom (df) of 29. This yields values between 0 (no effect of ITD) and 1  
481 (response amplitudes completely determined by ITD).

## 482 **Mutual information (MI) calculation**

483 MI quantifies the statistical dependence between stimulus and response amplitude in bits  
484 per response according to the formula

$$485 \quad MI(S; R) = \sum_{s \in S} \sum_{r \in R} \log_2 \left( \frac{p(r, s)}{p(r) \cdot p(s)} \right). \quad (1)$$

486 Here  $p(r)$  is the probability that the response of a given trial is of magnitude  $r$ ,  $p(s)$  is the  
487 probability that the ITD stimulus parameter of a given trial is  $s$ , and  $p(r, s)$  is the probability  
488 that response  $r$  and stimulus  $s$  co-occurred in a given trial. It is common practice to bin the  
489 set of possible responses into a suitable number of discrete steps. We performed this  
490 binning using the function  $binr()$  of the “information breakdown toolbox” [67] with

491 equipopulated binning. The probabilities  $p(s)$ ,  $p(r)$  and  $p(r,s)$  are not know exactly and must  
492 be estimated from the observed frequencies of stimuli and responses in the data set. It is  
493 well established that sampling errors in these probability estimates lead to a somewhat  
494 inflated (positively biased) estimate of the true MI [68]. As described in [69] a number of  
495 methods have been proposed to correct for this bias. Here we bias corrected our MI  
496 estimates by a permutation test at  $\alpha=0.01$  as described in [70], where stimulus-response  
497 pairings are randomly reshuffled. This should destroy any underlying association between  
498 stimulus and response and thereby, in theory, lead to an MI of zero. In practice, the  
499 shuffled data yield small positive MI values which serve as bootstrap estimates for the size  
500 of the bias. By repeating the random reshuffling 1000 times we calculated a distribution of  
501 bias estimates for each multi-unit, and subtracted the mean bias from the original, "raw" MI  
502 value to obtain the bias corrected values (Fig. 2b). We also used the distribution of bias  
503 estimates to assess whether the tuning of a multi-unit to ITD was statistically significant.  
504 Only multi-units whose raw MI values exceeded 99% of the bias estimates were deemed  
505 significantly tuned at  $\alpha<0.01$ .

## 506 Psychometric curve fitting

507 In order to derive summary statistics that could serve as measures of ITD sensitivity from  
508 the thousands of trials performed by each animal we fitted psychometric models to the  
509 observed data. It is common practice in human psychophysics to fit performance data with  
510 cumulative Gaussian functions [71,72]. This practice is well motivated in signal detection  
511 theory, which assumes that the perceptual decisions made by the experimental subject are  
512 informed by sensory signals which are subject to multiple, additive, and hence  
513 approximately normally distributed sources of noise. When the sensory signals are very  
514 large relative to the inherent noise then the task is easy and the subject will make the  
515 appropriate choice with near certainty. For binaural cues closer to threshold, the probability  
516 of choosing "right" ( $p_R$ ) can be modeled by the function

$$517 \quad p_R = \Phi(ITD \cdot \alpha) \quad (2)$$

518 where,  $\Phi$  is the cumulative normal distribution,  $ITD$  denotes the interaural time difference  
519 (arrival time at left ear minus arrival time at right ear, in ms), and  $\alpha$  is a sensitivity scale  
520 parameter which captures how big a change in the proportion of "right" choices a given  
521 change in ITD can provoke, with units of 1/ms.

522 Functions of the type in equation (2) tend to fit psychometric data for 2AFC tests with  
523 human participants well, where subjects can be easily briefed and lack of clarity about the  
524 task, lapses of attention or strong biases in the perceptual choices are small enough to be  
525 explored. However, animals have to work out the task for themselves through trial and  
526 error, and may spend some proportion of trials on "exploratory guesses" rather than direct  
527 perceptual decisions. If we denote the proportion of trials during which the animal makes  
528 such guesses (the "lapse rate") by  $\gamma$ , then the proportion of trials during which the animal's  
529 responses are governed by processes which are well modeled by equation (2) is reduced  
530 to  $(1-\gamma)$ . Furthermore, animals may exhibit two types of bias: an "ear bias" and a "spout  
531 bias". An "ear-bias" exists if the animal hears the mid-line (50% right point) at ITD values

532 which differ from zero by some small value  $\beta$ . A “spout bias” exists if the animal has an  
533 idiosyncratic preference for one of the two response spouts or the other, which may  
534 increase its probability of choosing the right spout by  $\delta$  (where  $\delta$  can be negative if the  
535 animal prefers the left spout). Assuming the effect of lapses, spout and ear bias to be  
536 additive, we therefore extended eqn (2) to the following psychometric model:

$$537 \quad p_R = \Phi(\text{ITD} \cdot \alpha + \beta) \cdot (1 - \gamma) + \gamma/2 + \delta \quad (3)$$

538 We fitted the model in equation (3) to the observed proportions of “right” responses as a  
539 function of stimulus ITD using the `scipy.optimize.minimize()` function of Python 3.4, using  
540 gradient descent methods to find maximum likelihood estimates for the parameters  $\alpha$ ,  $\beta$ ,  $\gamma$   
541 and  $\delta$  given the data. This cumulative Gaussian model fitted the data very well, as is  
542 readily apparent in Figure 3a-j. We then used the slope of the psychometric function  
543 around zero ITD as our maximum likelihood estimate of the animal’s ITD sensitivity, as  
544 plotted in Figure 3k. That slope is easily calculated using the equation

$$545 \quad \text{slope} = \varphi(0) \cdot \alpha \cdot (1 - \gamma) \quad (4)$$

546 which is obtained by differentiating equation 3 and setting ITD=0.  $\varphi(0)$  is the Gaussian  
547 normal probability density at zero ( $\approx 0.3989$ ).

548 Seventy-five % correct thresholds were computed as the mean absolute ITD at which the  
549 psychometric dips below 25% or rises above 75% “right” responses respectively.



## 550 **Acknowledgements**

551 We thank A. Hyun Jung for assisting in the behavioral training of the CI rats. We gratefully  
552 acknowledge the support from Dr. P. Ruther and the *Cluster of Excellence BrainLinks-*  
553 *BrainTools* (German Research Foundation, grant number EXC1086) for providing  
554 electrodes for IC recordings. The work leading to this publication was supported by a  
555 startup grant from the Vice President of Research and Technology (VPRT) of the City  
556 University of Hong Kong, the German Academic Exchange Service (DAAD) with funds  
557 from the German Federal Ministry of Education and Research (BMBF) and the People  
558 Programme (Marie Curie Actions) of the European Union's Seventh Framework  
559 Programme (FP7/2007-2013) under REA grant agreement n° 605728 (P.R.I.M.E. –  
560 Postdoctoral Researchers International Mobility Experience), and the booster club “Taube  
561 Kinder lernen hören e. V.”.

## 562 **Author Contributions**

563 N.R.K. and J.W.H.S. designed the study. N.R.K., A.N.B., K.L., and J.W.H.S. performed the  
564 experiments. J.W.H.S., N.R.K., and A.N.B. evaluated the data. N.R.K. and J.W.H.S wrote  
565 the article. All authors approved the final manuscript.

## 566 **Declaration of Interests**

567 The authors declare no competing interests.

569

## 570 **References**

- 571 1. Kral, A. & Sharma, A. Developmental neuroplasticity after cochlear implantation. *Trends*  
572 *Neurosci.* **35**, 111-122 (2012)
- 573 2. Ellinger, R. L., Jakien, K. M. & Gallun, F. J. The role of interaural differences on speech  
574 intelligibility in complex multi-talker environments. *J. Acoust. Soc. Am.* **141**, EL170 (2017)
- 575 3. Litovsky, R. Bilateral Cochlear Implants. *ASHA Leader* **15**, 14 (2010)
- 576 4. Conti-Ramsden, G., St Clair, M. C., Pickles, A. & Durkin, K. Developmental trajectories of  
577 verbal and nonverbal skills in individuals with a history of specific language impairment: from  
578 childhood to adolescence.. *J. Speech. Lang. Hear. Res* **55**, 1716-1735 (2012)
- 579 5. Ehlers, E., Goupell, M. J., Zheng, Y., Godar, S. P. & Litovsky, R. Y. Binaural sensitivity in  
580 children who use bilateral cochlear implants. *J. Acoust. Soc. Am.* **141**, 4264-4277 (2017)
- 581 6. van Hoesel, R. J. M. Exploring the Benefits of Bilateral Cochlear Implants. *Audiol. Neurootol.* **9**,  
582 234-246 (2004)
- 583 7. van Hoesel, R. J. M. Contrasting benefits from contralateral implants and hearing aids in cochlear  
584 implant users. *Hear. Res.* **288**, 100-113 (2012)
- 585 8. Schnupp, J., Nelken, I. & King, A. *Auditory neuroscience : making sense of sound.* (MIT Press,  
586 Cambridge, Mass. ; London, 2011)
- 587 9. Zwislocki, J. & Feldman, R. S. Just Noticeable Dichotic Phase Difference. *J. Acoust. Soc. Am.*  
588 **28**, 152-153 (1956)
- 589 10. Kerber, S. & Seeber, B. U. Sound Localization in Noise by Normal-Hearing Listeners and  
590 Cochlear Implant Users. *Ear Hear.* **33**, 445-457 (2012)
- 591 11. Laback, B., Egger, K. & Majdak, P. Perception and coding of interaural time differences with  
592 bilateral cochlear implants. *Hear. Res.* **322**, 138-150 (2015)
- 593 12. Poon, B. B., Eddington, D. K., Noel, V. & Colburn, H. S. Sensitivity to interaural time  
594 difference with bilateral cochlear implants: Development over time and effect of interaural  
595 electrode spacing. *J. Acoust. Soc. Am.* **126**, 806-815 (2009)
- 596 13. Litovsky, R. Y. & Gordon, K. Bilateral cochlear implants in children: Effects of auditory  
597 experience and deprivation on auditory perception. *Hear. Res.* **338**, 76-87 (2016)
- 598 14. Yusuf, P. A., Hubka, P., Tillein, J. & Kral, A. Induced cortical responses require developmental  
599 sensory experience. *Brain* **140**, 3153-3165 (2017)
- 600 15. Rosskothén-Kuhl, N. & Illing, R.-B. The impact of hearing experience on signal integration in  
601 the auditory brainstem: A c-Fos study of the rat. *Brain Res.* **1435**, 40-55 (2012)
- 602 16. Rauch, A.-K., Rosskothén-Kuhl, N. & Illing, R.-B. Counter-regulation of the AP-1 monomers  
603 pATF2 and Fos: Molecular readjustment of brainstem neurons in hearing and deaf adult rats

- 604 after electrical intracochlear stimulation. *Neuroscience* **313**, 184-198 (2016)
- 605 17. Osako, S., Tokimoto, T. & Matsuura, S. Effects of kanamycin on the auditory evoked responses  
606 during postnatal development of the hearing of the rat. *Acta Otolaryngol. (Stockh.)* **88**, 359-368  
607 (1979)
- 608 18. Illing, R.-B. & Rosskothén-Kuhl, N. *The cochlear implant in action: molecular changes*  
609 *induced in the rat central auditory system*. (INTECH Open Access Publisher, Freiburg, 2012)
- 610 19. Rosskothén-Kuhl, N., Hildebrandt, H., Birkenhäger, R. & Illing, R.-B. Astrocyte Hypertrophy  
611 and Microglia Activation in the Rat Auditory Midbrain Is Induced by Electrical Intracochlear  
612 Stimulation. *Front. Cell. Neurosci.* **12**, (2018)
- 613 20. Seidl, A. H. & Grothe, B. Development of sound localization mechanisms in the mongolian  
614 gerbil is shaped by early acoustic experience. *J. Neurophysiol.* **94**, 1028-1036 (2005)
- 615 21. Beiderbeck, B., Myoga, M. H., Müller, N. I. C., Callan, A. R., Friauf, E., et al Precisely timed  
616 inhibition facilitates action potential firing for spatial coding in the auditory brainstem. *Nat.*  
617 *Commun.* **9**, (2018)
- 618 22. Hancock, K. E., Noel, V., Ryugo, D. K. & Delgutte, B. Neural coding of interaural time  
619 differences with bilateral cochlear implants: effects of congenital deafness. *J. Neurosci.* **30**,  
620 14068-14079 (2010)
- 621 23. Hancock, K. E., Chung, Y. & Delgutte, B. Neural ITD coding with bilateral cochlear implants:  
622 effect of binaurally coherent jitter. *J. Neurophysiol.* **108**, 714-728 (2012)
- 623 24. Hancock, K. E., Chung, Y. & Delgutte, B. Congenital and prolonged adult-onset deafness cause  
624 distinct degradations in neural ITD coding with bilateral cochlear implants. *JARO* **14**, 393-411  
625 (2013)
- 626 25. Tillein, J., Hubka, P., Syed, E., Hartmann, R., Engel, A., et al Cortical representation of  
627 interaural time difference in congenital deafness. *Cereb. Cortex* **20**, 492-506 (2009)
- 628 26. Tillein, J., Hubka, P. & Kral, A. Monaural Congenital Deafness Affects Aural Dominance and  
629 Degrades Binaural Processing.. *Cereb. Cortex* **26**, 1762-1777 (2016)
- 630 27. Koka, K., Read, H. L. & Tollin, D. J. The acoustical cues to sound location in the rat:  
631 measurements of directional transfer functions. *J. Acoust. Soc. Am.* **123**, 4297-4309 (2008)
- 632 28. Smith, Z. M. & Delgutte, B. Sensitivity to interaural time differences in the inferior colliculus  
633 with bilateral cochlear implants. *J. Neurosci.* **27**, 6740-6750 (2007)
- 634 29. Vollmer, M. Neural processing of acoustic and electric interaural time differences in normal-  
635 hearing gerbils. *J. Neurosci.* **38**, 6949-6966 (2018)
- 636 30. Litovsky, R. Y., Jones, G. L., Agrawal, S. & van Hoesel, R. Effect of age at onset of deafness on  
637 binaural sensitivity in electric hearing in humans. *J. Acoust. Soc. Am.* **127**, 400-414 (2010)
- 638 31. Klumpp, R. & Eady, H. Some measurements of interaural time difference thresholds. *J. Acoust.*

- 639      *Soc. Am.* **28**, 859-860 (1956)
- 640      32. Keating, P., Nodal, F. R., Gananandan, K., Schulz, A. L. & King, A. J. Behavioral sensitivity to  
641      broadband binaural localization cues in the ferret. *JARO* **14**, 561-572 (2013)
- 642      33. Grothe, B. & Klump, G. M. Temporal processing in sensory systems. *Curr. Opin. Neurobiol.* **10**,  
643      467-473 (2000)
- 644      34. Wesolek, C. M., Koay, G., Heffner, R. S. & Heffner, H. E. Laboratory rats (*Rattus norvegicus*)  
645      do not use binaural phase differences to localize sound. *Hear. Res.* **265**, 54-62 (2010)
- 646      35. Joris, P. X. & Yin, T. C. Envelope coding in the lateral superior olive. I. Sensitivity to interaural  
647      time differences. *J. Neurophysiol.* **73**, 1043-1062 (1995)
- 648      36. Bernstein, L. R. Auditory processing of interaural timing information: new insights. *J. Neurosci.*  
649      *Res.* **66**, 1035-1046 (2001)
- 650      37. Kan, A., Jones, H. G. & Litovsky, R. Y. Lateralization of interaural timing differences with  
651      multi-electrode stimulation in bilateral cochlear-implant users. *J. Acoust. Soc. Am.* **140**, EL392  
652      (2016)
- 653      38. Chung, Y., Hancock, K. E. & Delgutte, B. Neural Coding of Interaural Time Differences with  
654      Bilateral Cochlear Implants in Unanesthetized Rabbits. *J. Neurosci.* **36**, 5520-5531 (2016)
- 655      39. Brunso-Bechtold, J. K., Henkel, C. K. & Linville, C. Ultrastructural development of the medial  
656      superior olive (MSO) in the ferret. *J. Comp. Neurol.* **324**, 539-556 (1992)
- 657      40. Hoffpauir, B. K., Grimes, J. L., Mathers, P. H. & Spirou, G. A. Synaptogenesis of the calyx of  
658      Held: rapid onset of function and one-to-one morphological innervation. *J. Neurosci.* **26**, 5511-  
659      5523 (2006)
- 660      41. Kapfer, C., Seidl, A. H., Schweizer, H. & Grothe, B. Experience-dependent refinement of  
661      inhibitory inputs to auditory coincidence-detector neurons. *Nat. Neurosci.* **5**, 247-253 (2002)
- 662      42. Walker, K. M., Schnupp, J. W., Hart-Schnupp, S. M., King, A. J. & Bizley, J. K. Pitch  
663      discrimination by ferrets for simple and complex sounds. *J. Acoust. Soc. Am.* **126**, 1321-1335  
664      (2009)
- 665      43. Bizley, J. K., Walker, K. M. M., Nodal, F. R., King, A. J. & Schnupp, J. W. H. Auditory cortex  
666      represents both pitch judgments and the corresponding acoustic cues. *Curr. Biol.* **23**, 620-625  
667      (2013)
- 668      44. Keating, P., Dahmen, J. C. & King, A. J. Context-specific reweighting of auditory spatial cues  
669      following altered experience during development. *Current biology : CB* **23**, 1291-1299 (2013)
- 670      45. Keating, P., Dahmen, J. C. & King, A. J. Complementary adaptive processes contribute to the  
671      developmental plasticity of spatial hearing. *Nat. Neurosci.* **18**, 185-187 (2015)
- 672      46. Ko, H., Cossell, L., Baragli, C., Antolik, J., Clopath, C., et al The emergence of functional  
673      microcircuits in visual cortex. *Nature* **496**, 96-100 (2013)

- 674 47. Levi, D. M., Knill, D. C. & Bavelier, D. Stereopsis and amblyopia: a mini-review. *Vision Res.*  
675 **114**, 17-30 (2015)
- 676 48. Wilson, B. S., Finley, C. C., Lawson, D. T., Wolford, R. D., Eddington, D. K., et al Better  
677 speech recognition with cochlear implants. *Nature* **352**, 236-238 (1991)
- 678 49. Loizou, P. C., Poroy, O. & Dorman, M. The effect of parametric variations of cochlear implant  
679 processors on speech understanding. *J. Acoust. Soc. Am.* **108**, 790-802 (2000)
- 680 50. van Hoesel, R. J. M. Sensitivity to binaural timing in bilateral cochlear implant users. *J. Acoust.*  
681 *Soc. Am.* **121**, 2192-2206 (2007)
- 682 51. Laback, B., Majdak, P. & Baumgartner, W.-D. Lateralization discrimination of interaural time  
683 delays in four-pulse sequences in electric and acoustic hearing. *J. Acoust. Soc. Am.* **121**, 2182-  
684 2191 (2007)
- 685 52. Joris, P. X. & Yin, T. C. Envelope coding in the lateral superior olive. III. Comparison with  
686 afferent pathways. *J. Neurophysiol.* **79**, 253-269 (1998)
- 687 53. Thakkar, T., Kan, A., Jones, H. G. & Litovsky, R. Y. Mixed stimulation rates to improve  
688 sensitivity of interaural timing differences in bilateral cochlear implant listeners. *J. Acoust. Soc.*  
689 *Am.* **143**, 1428 (2018)
- 690 54. Srinivasan, S., Laback, B., Majdak, P. & Delgutte, B. Introducing Short Interpulse Intervals in  
691 High-Rate Pulse Trains Enhances Binaural Timing Sensitivity in Electric Hearing. *JARO* **19**,  
692 301-315 (2018)
- 693 55. Matsuda, K., Ueda, Y., Doi, T., Tono, T., Haruta, A., et al Increase in glutamate-aspartate  
694 transporter (GLAST) mRNA during kanamycin-induced cochlear insult in rats. *Hear. Res.* **133**,  
695 10-16 (1999)
- 696 56. Argence, M., Vassias, I., Kerhuel, L., Vidal, P.-P. & de Waele, C. Stimulation by cochlear  
697 implant in unilaterally deaf rats reverses the decrease of inhibitory transmission in the inferior  
698 colliculus. *Eur. J. Neurosci.* **28**, 1589-1602 (2008)
- 699 57. Jero, J., Coling, D. E. & Lal, A. K. The Use of Preyer's Reflex in Evaluation of Hearing in Mice.  
700 *Acta Otolaryngol. (Stockh.)* **121**, 585-589 (2001)
- 701 58. Blatchley, B., Cooper, W. & Coleman, J. Development of auditory brainstem response to tone  
702 pip stimuli in the rat. *Dev. Brain Res.* **32**, 75 - 84 (1987)
- 703 59. Rosskothén, N., Hirschmüller-Ohmes, I. & Illing, R.-B. AP-1 activity rises by stimulation-  
704 dependent c-Fos expression in auditory neurons. *Neuroreport* **19**, 1091-1093 (2008)
- 705 60. Rosskothén-Kuhl, N. & Illing, R.-B. Nonlinear development of the populations of neurons  
706 expressing c-Fos under sustained electrical intracochlear stimulation in the rat auditory  
707 brainstem. *Brain Res.* **1347**, 33-41 (2010)
- 708 61. Rosskothén-Kuhl, N. & Illing, R.-B. Gap43 transcription modulation in the adult brain depends

- 709 on sensory activity and synaptic cooperation. *PLoS One* **9**, e92624 (2014)
- 710 62. Rosskothén-Kuhl, N. & Illing, R.-B. The utilization of brain plasticity by cochlear implants :  
711 Molecular and cellular changes due to electrical intracochlear stimulation. *HNO* **63**, 94-103  
712 (2015)
- 713 63. Keating, P., Nodal, F. R. & King, A. J. Behavioural sensitivity to binaural spatial cues in ferrets:  
714 evidence for plasticity in the duplex theory of sound localization. *Eur. J. Neurosci.* **39**, 197-206  
715 (2014)
- 716 64. Wightman, F. L. & Kistler, D. J. The dominant role of low-frequency interaural time differences  
717 in sound localization.. *J. Acoust. Soc. Am.* **91**, 1648-1661 (1992)
- 718 65. Syka, J., Popelár, J., Kvasnák, E. & Astl, J. Response properties of neurons in the central  
719 nucleus and external and dorsal cortices of the inferior colliculus in guinea pig. *Exp. Brain Res.*  
720 **133**, 254-266 (2000)
- 721 66. Schnupp, J. W. H., Garcia-Lazaro, J. A. & Lesica, N. A. Periodotopy in the gerbil inferior  
722 colliculus: local clustering rather than a gradient map. *Front. Neural Circuits* **9**, 37 (2015)
- 723 67. Magri, C., Whittingstall, K., Singh, V., Logothetis, N. K. & Panzeri, S. A toolbox for the fast  
724 information analysis of multiple-site LFP, EEG and spike train recordings. *BMC neuroscience*  
725 **10**, 81 (2009)
- 726 68. Treves, A. & Panzeri, S. The upward bias in measures of information derived from limited data  
727 samples. *Neural Comput.* **7**, 399-407 (1995)
- 728 69. Nelken, I., Chechik, G., Msršic-Flogel, T. D., King, A. J. & Schnupp, J. W. Encoding stimulus  
729 information by spike numbers and mean response time in primary auditory cortex. *J. Comput.*  
730 *Neurosci.* **19**, 199-221 (2005)
- 731 70. Schnupp, J. W. H., Hall, T. M., Kokelaar, R. F. & Ahmed, B. Plasticity of temporal pattern codes  
732 for vocalization stimuli in primary auditory cortex. *J. Neurosci.* **26**, 4785-4795 (2006)
- 733 71. Wickens, T. D. *Elementary signal detection theory*. (Oxford University Press, USA, , 2002)
- 734 72. Schnupp, J. W., Dawe, K. L. & Pollack, G. L. The detection of multisensory stimuli in an  
735 orthogonal sensory space. *Exp. Brain Res.* **162**, 181-190 (2005)
- 736 73. van Hoesel, R. J. & Tyler, R. S. Speech perception, localization, and lateralization with bilateral  
737 cochlear implants. *The Journal of the Acoustical Society of America* **113**, 1617-1630 (2003)

## 1 Figures plus Figure Legends

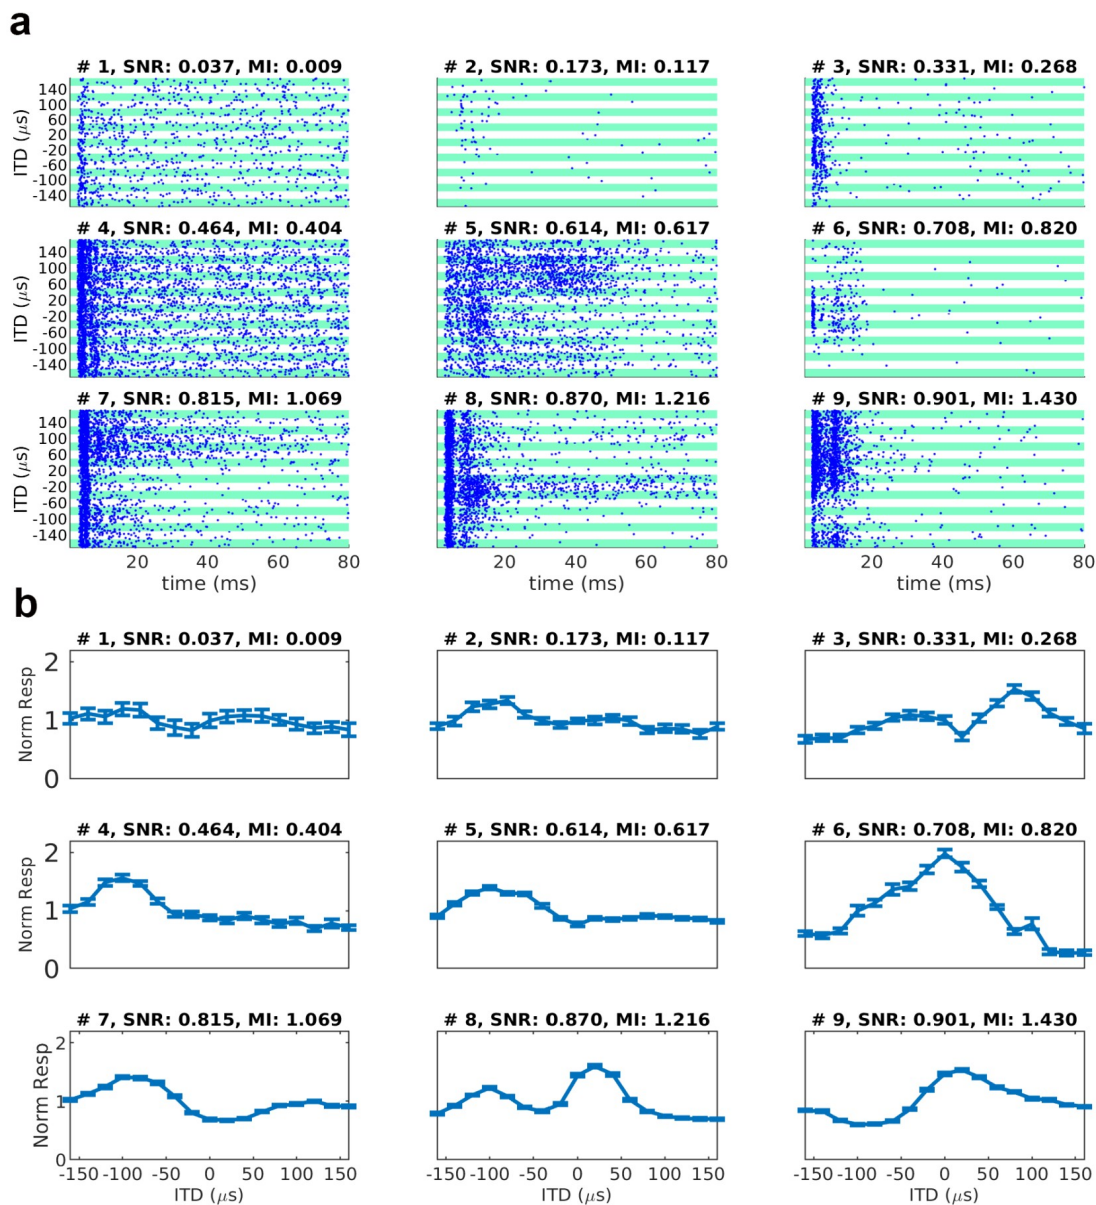

2  
3 **Figure 1:** IC neurons of ND rats exhibit varying degrees and types of ITD sensitivity  
4 immediately after adult cochlear implantation. Dot raster plots (**a**) and their corresponding  
5 ITD tuning curves (**b**) for a number of multi-units selected to illustrate some of the variety  
6 of ITD tuning depths and types observed in this study. **a** Each blue dot shows the timing of  
7 one spike. The alternating white and green bands show responses to n=30 repeats each  
8 of CI binaural pulse stimuli at the ITDs shown along the left margins. **b** Corresponding  
9 multi-unit tuning curves, showing the response amplitudes above baseline and normalized  
10 relative to the maximum response during a period of 3-80 ms post stimulus onset, as a  
11 function of stimulus ITD. Error bars show SEM. Above each sub-panel we show the signal-  
12 to-noise (SNR) and mutual information (MI) values calculated to quantify the strength of

13 the tuning to ITD (see Methods). Sub-panels are arranged by increasing SNR and MI.  
14 ITD>0: ipsilateral ear leading; ITD<0: contralateral ear leading.  
15  
16

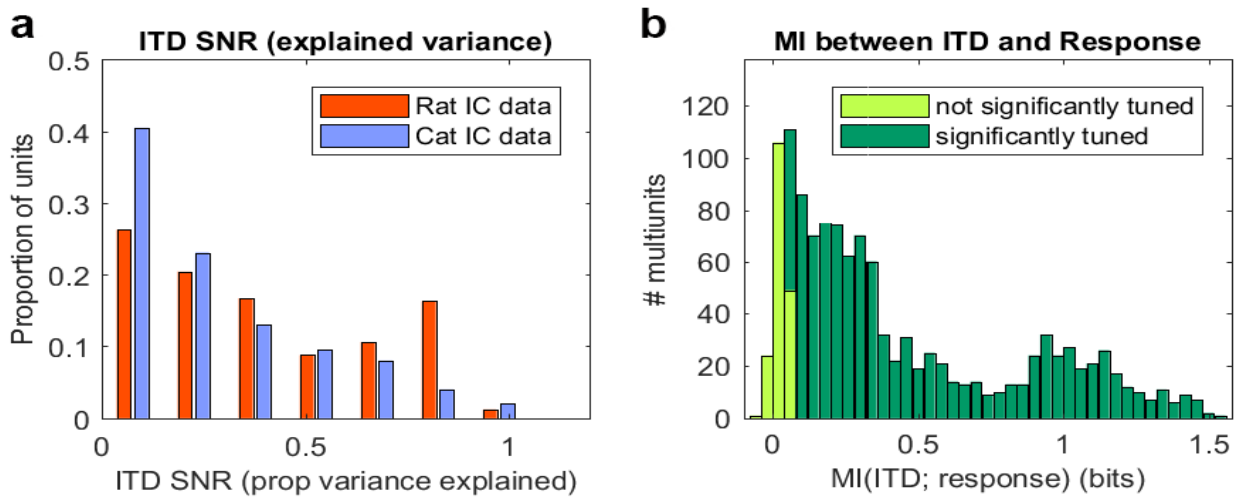

18  
19 **Figure 2:** Signal-to-noise (SNR) and mutual information (MI) values show that substantial  
20 ITD tuning is widespread in the IC of ND rats. **a** Distribution of ITD SNR values for multi-  
21 units recorded in the ICs of our ND, CI-stimulated rats (red columns). For comparison, IC  
22 single-unit SNR values recorded in congenitally deaf CI cats by [22] (blue columns). **b**  
23 Distribution of MI values in bits / response for mutual information between response  
24 amplitude and stimulus ITD. MI values which were not significantly greater than zero  
25 (permutation test,  $\alpha=0.01$ ) are shown in light green.



26

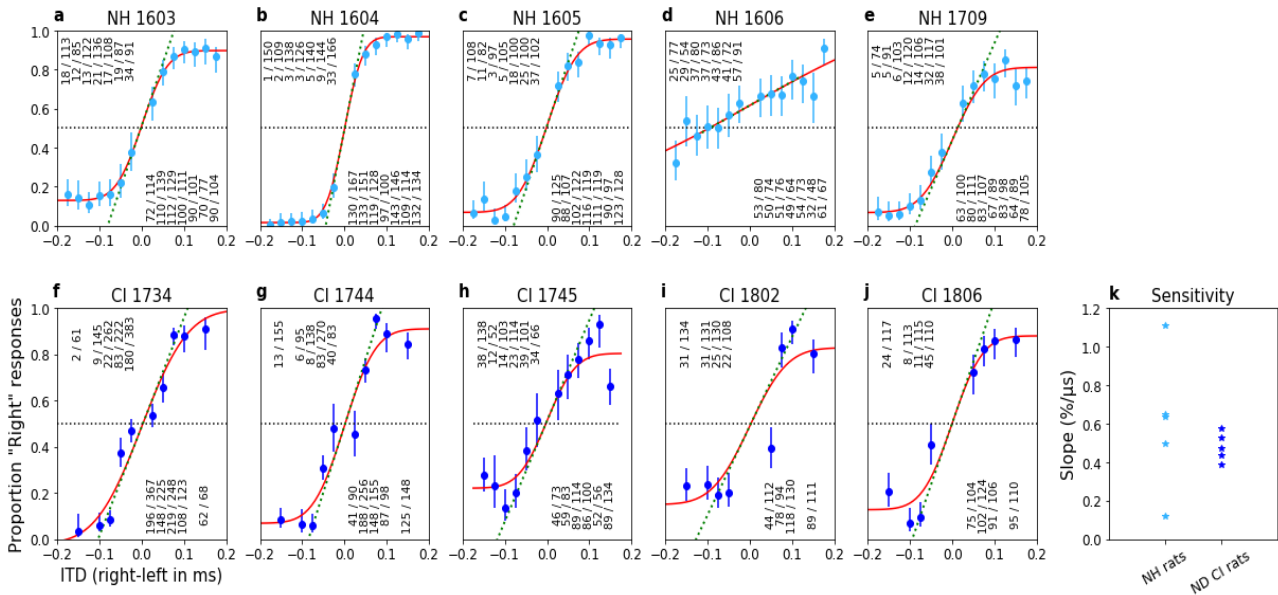

28 **Figure 3:** Early deaf CI rats discriminate ITD as accurately as their normally hearing litter  
 29 mates. **a-j** ITD psychometric curves of normal hearing (**a-e**) and neonatally deafened CI  
 30 rats (**f-j**). The titles above the panels show the ID number of the corresponding  
 31 experimental animal. Y-axis: proportion of responses to the right-hand side. X-axis:  
 32 Stimulus ITD in ms, with negative values indicating that the left ear stimulus is leading.  
 33 Blue dots: observed proportions of “right” responses for the stimulus ITD given by the x-  
 34 coordinate. Number fractions shown above or below each dot indicate the absolute  
 35 number of trials and “right” responses for the corresponding ITD. Blue error bars show  
 36 Wilson score 95% confidence intervals for the underlying proportion “right” judgments.  
 37 Red lines show sigmoid psychometric curves fitted to the blue data using maximum likelihood.  
 38 The green dashed lines show the slopes of the psychometric curves at x=0. These slopes  
 39 serve to quantify the behavioral sensitivity of the animal to ITD. Panel **k** summarizes the  
 40 ITD sensitivities (psychometric slopes) across the individual animal data shown in **a-j** in  
 41 units of % change in the animals’ “right” judgments per  $\mu$ s change in ITD.
